# Supplementary material for: Elemental assessment of dried and ground samples of leeches via portable X-ray fluorescence
Source: Royal Society of Chemistry journal article supplement (doi:10.1039/d0ja00328j), 2020-01-01
Supplement: d0ja00328j1.pdf [file d0ja00328j1.pdf]

**Table S1** Elemental concentrations of 60 leech samples obtained by pXRF and ICP methods

| SAMPLE | Zn (mg Kg <sup>-1</sup> ) |       | Fe (mg Kg <sup>-1</sup> ) |      | Cu (mg Kg <sup>-1</sup> ) |       | As (mg Kg <sup>-1</sup> ) |       | Ca (mg Kg <sup>-1</sup> ) |      | K (mg Kg <sup>-1</sup> ) |      | S (mg Kg <sup>-1</sup> ) |       |
|--------|---------------------------|-------|---------------------------|------|---------------------------|-------|---------------------------|-------|---------------------------|------|--------------------------|------|--------------------------|-------|
|        | PXRF                      | ICP   | PXRF                      | ICP  | PXRF                      | ICP   | PXRF                      | ICP   | PXRF                      | ICP  | PXRF                     | ICP  | PXRF                     | ICP   |
| HB-2-1 | 485.05                    | 316   | 486.39                    | 406  | 24.52                     | 22.1  | 9.96                      | 8.25  | 2906.45                   | 1800 | 10869.54                 | 6700 | 48382.63                 | 32100 |
| HB-2-2 | 368.51                    | 237   | 508.74                    | 464  | 34.71                     | 29.5  | 4.45                      | 4     | 4523.69                   | 3400 | 10475.07                 | 6700 | 40905.07                 | 30900 |
| HB-2-3 | 431.73                    | 272   | 704.11                    | 566  | 26.88                     | 21.3  | 5.38                      | 4.23  | 3554.02                   | 1900 | 11181.31                 | 6300 | 40503.64                 | 31500 |
| HB-2-5 | 396.21                    | 278   | 584.83                    | 513  | 21.08                     | 23.5  | 6.19                      | 5.24  | 4508.54                   | 2200 | 11974.70                 | 6400 | 39713.07                 | 30500 |
| JS-1-1 | 93.04                     | 84.6  | 501.41                    | 612  | <LOD                      | 15.8  | <LOD                      | 2.69  | 911.97                    | 900  | 2597.40                  | 2100 | 73510.32                 | 75000 |
| JS-1-3 | 78.51                     | 75.4  | 122.17                    | 238  | <LOD                      | 18.7  | <LOD                      | 3.84  | 1576.23                   | 1000 | 2343.36                  | 2000 | 72966.91                 | 75500 |
| JS-1-5 | 89.88                     | 86.3  | 450.69                    | 545  | <LOD                      | 15.95 | <LOD                      | 3.53  | 1536.25                   | 1000 | 2736.11                  | 2100 | 76326.05                 | 77500 |
| JS-2-3 | 318.25                    | 206   | 924.50                    | 657  | 35.10                     | 27    | 6.25                      | 5.12  | 4728.92                   | 2800 | 11574.81                 | 6700 | 43947.85                 | 28600 |
| JS-2-5 | 361.85                    | 248   | 942.57                    | 807  | 46.71                     | 39.5  | 17.26                     | 12.45 | 7541.31                   | 4000 | 15718.51                 | 7400 | 31203.65                 | 18800 |
| JS-3-1 | 365.94                    | 230   | 1902.01                   | 1390 | 46.20                     | 33.9  | 14.05                     | 10.35 | 7059.03                   | 3600 | 21951.73                 | 8800 | 16591.11                 | 7980  |
| JS-3-3 | 529.56                    | 332   | 1118.13                   | 908  | 90.79                     | 64.9  | 8.99                      | 7.28  | 5403.74                   | 2700 | 23402.89                 | 9400 | 12620.08                 | 7970  |
| JS-3-6 | 372.79                    | 237   | 738.29                    | 602  | 68.31                     | 51.5  | 9.55                      | 7.57  | 6583.94                   | 3600 | 22500.92                 | 9300 | 12958.48                 | 8450  |
| JS-4-1 | 114.75                    | 108   | 444.44                    | 581  | 22.26                     | 31.7  | <LOD                      | 3.01  | 1687.33                   | 1900 | 3520.61                  | 3000 | 88395.88                 | 88600 |
| JS-4-2 | 146.72                    | 128.5 | 500.31                    | 553  | 23.48                     | 29.4  | 5.19                      | 4.7   | 1927.06                   | 2000 | 4374.58                  | 3400 | 85099.15                 | 74200 |
| JS-4-4 | 131.34                    | 114   | 312.21                    | 378  | 19.30                     | 27.9  | <LOD                      | 2.96  | 1889.53                   | 1900 | 4799.22                  | 3700 | 78946.11                 | 68200 |
| JS-4-6 | 144.17                    | 125   | 569.51                    | 628  | 19.80                     | 25.7  | <LOD                      | 2.45  | 1669.78                   | 1600 | 5185.63                  | 3800 | 85134.48                 | 71000 |
| JS-5-1 | 256.40                    | 174   | 442.26                    | 385  | 35.24                     | 39.4  | 3.96                      | 3.74  | 7502.02                   | 3800 | 19524.45                 | 8300 | 16593.15                 | 10200 |
| JS-5-2 | 214.07                    | 135.5 | 110.69                    | 180  | <LOD                      | 18.1  | <LOD                      | 3.17  | 3126.26                   | 1500 | 18983.80                 | 7300 | 9413.48                  | 5720  |
| JS-5-3 | 264.91                    | 159   | 209.26                    | 248  | 31.03                     | 32.6  | 4.95                      | 4.71  | 4886.18                   | 2100 | 21900.85                 | 7900 | 10533.18                 | 5920  |
| JS-6-1 | 486.50                    | 286   | 947.65                    | 732  | 37.31                     | 35.3  | 10.18                     | 8.58  | 7834.66                   | 3500 | 20738.52                 | 7900 | 12009.12                 | 6860  |
| JS-6-3 | 408.28                    | 241   | 1236.21                   | 848  | 17.82                     | 22.9  | 9.33                      | 7.82  | 7465.35                   | 3300 | 20721.14                 | 7900 | 12147.64                 | 6930  |
| JS-7-1 | 280.49                    | 172   | 307.85                    | 258  | 20.95                     | 26.7  | <LOD                      | 3.53  | 4796.14                   | 2200 | 18107.31                 | 7000 | 14400.59                 | 8260  |
| JS-7-2 | 199.21                    | 125.5 | 159.64                    | 210  | 16.54                     | 21    | <LOD                      | 2.35  | 3710.27                   | 1700 | 18996.52                 | 7000 | 9470.42                  | 5640  |

**Table S1** Elemental concentrations of 60 leech samples obtained by pXRF and ICP methods

| SAMPLE   | Zn (mg Kg <sup>-1</sup> ) |       | Fe (mg Kg <sup>-1</sup> ) |      | Cu (mg Kg <sup>-1</sup> ) |      | As (mg Kg <sup>-1</sup> ) |      | Ca (mg Kg <sup>-1</sup> ) |      | K (mg Kg <sup>-1</sup> ) |      | S (mg Kg <sup>-1</sup> ) |       |
|----------|---------------------------|-------|---------------------------|------|---------------------------|------|---------------------------|------|---------------------------|------|--------------------------|------|--------------------------|-------|
|          | PXRF                      | ICP   | PXRF                      | ICP  | PXRF                      | ICP  | PXRF                      | ICP  | PXRF                      | ICP  | PXRF                     | ICP  | PXRF                     | ICP   |
| JS-7-3   | 213.75                    | 132.5 | 146.02                    | 203  | 20.98                     | 25.8 | <LOD                      | 2.47 | 3270.99                   | 1500 | 19298.89                 | 7100 | 9629.69                  | 5610  |
| JS-8-1   | 206.22                    | 150   | 319.95                    | 388  | <LOD                      | 23.5 | <LOD                      | 2.99 | 3454.90                   | 2100 | 11779.18                 | 6300 | 54880.11                 | 37800 |
| JS-8-2   | 213.45                    | 146   | 213.52                    | 284  | 26.96                     | 35.9 | <LOD                      | 3.75 | 4838.87                   | 2700 | 14890.41                 | 7600 | 42964.26                 | 26600 |
| JS-8-3   | 222.91                    | 151   | 238.84                    | 297  | 38.61                     | 42.4 | <LOD                      | 3.39 | 3326.02                   | 1900 | 14981.66                 | 7300 | 42429.34                 | 25200 |
| JS-9-1   | 415.28                    | 233   | 387.97                    | 356  | 19.81                     | 22.5 | 4.85                      | 4.64 | 3737.53                   | 1700 | 20827.14                 | 8000 | 12120.06                 | 7040  |
| JS-9-2   | 369.80                    | 220   | 464.39                    | 405  | 17.68                     | 21.3 | 6.84                      | 6.4  | 5456.67                   | 2500 | 22142.83                 | 8500 | 11726.95                 | 6790  |
| JS-9-3   | 337.32                    | 197   | 350.60                    | 329  | 18.07                     | 23.2 | 9.59                      | 7.89 | 4870.72                   | 2200 | 21734.41                 | 8200 | 11568.67                 | 6730  |
| JS-9-4   | 353.93                    | 195   | 943.56                    | 682  | 18.34                     | 20.7 | 6.83                      | 6.24 | 8823.80                   | 3800 | 21259.51                 | 7700 | 12027.64                 | 6550  |
| JS-9-5   | 398.88                    | 233   | 639.08                    | 471  | 17.89                     | 22.4 | 5.17                      | 4.75 | 5787.90                   | 2700 | 22509.49                 | 8500 | 11694.29                 | 6700  |
| JS-9-6   | 401.67                    | 238   | 617.74                    | 493  | 29.49                     | 30.1 | 7.29                      | 6.68 | 6238.06                   | 2800 | 20536.13                 | 7900 | 11454.58                 | 6840  |
| JSB-1-1  | 381.87                    | 220   | 1028.27                   | 752  | 60.52                     | 50   | 7.16                      | 6.03 | 5442.90                   | 2400 | 22332.73                 | 8300 | 11467.16                 | 6570  |
| JSB-1-10 | 378.16                    | 210   | 3939.63                   | 2870 | 1137.80                   | 875  | 7.88                      | 7.28 | 5051.02                   | 2400 | 23925.25                 | 8900 | 13678.87                 | 7010  |
| JSB-1-2  | 317.69                    | 188   | 643.15                    | 540  | 58.01                     | 52.9 | 5.93                      | 5.27 | 5698.92                   | 2800 | 22845.74                 | 8500 | 12058.24                 | 6900  |
| JSB-1-3  | 549.07                    | 313   | 971.83                    | 739  | 54.32                     | 48   | 12.33                     | 9.62 | 7284.03                   | 3300 | 22495.06                 | 8200 | 13352.01                 | 6700  |
| JSB-1-4  | 339.05                    | 201   | 654.26                    | 544  | 67.14                     | 59.7 | 7.87                      | 6.86 | 5553.27                   | 2600 | 22958.67                 | 8800 | 11698.33                 | 7010  |
| JSB-1-5  | 351.88                    | 209   | 513.59                    | 464  | 50.55                     | 51.2 | 9.50                      | 8.35 | 5473.56                   | 2500 | 21701.62                 | 8200 | 11989.38                 | 6790  |
| JSB-1-6  | 355.49                    | 213   | 410.52                    | 405  | 17.76                     | 22.8 | 4.88                      | 4.96 | 5922.60                   | 2900 | 21973.47                 | 9000 | 12282.46                 | 7360  |
| JSB-1-7M | 364.77                    | 237   | 412.33                    | 430  | 63.87                     | 59.8 | 7.48                      | 7.6  | 5660.09                   | 2800 | 23241.42                 | 9500 | 12249.24                 | 7440  |
| JSB-1-8  | 558.26                    | 328   | 592.32                    | 490  | 21.00                     | 24.2 | 7.22                      | 7.02 | 6502.85                   | 3100 | 22817.37                 | 9100 | 12407.57                 | 7470  |
| JSB-1-9  | 410.73                    | 238   | 495.06                    | 433  | 29.64                     | 31.5 | 18.52                     | 15.7 | 6958.99                   | 3100 | 22481.50                 | 8700 | 12103.39                 | 7090  |
| JSB-2-10 | 418.30                    | 234   | 3636.25                   | 2570 | 1046.81                   | 842  | 8.61                      | 7.77 | 5327.21                   | 2600 | 22607.96                 | 8700 | 11829.86                 | 6910  |
| JSB-2-2  | 354.25                    | 199.5 | 766.22                    | 559  | 30.08                     | 31.7 | 5.79                      | 5.89 | 5406.56                   | 2500 | 24215.49                 | 9000 | 12194.93                 | 6880  |

**Table S1** Elemental concentrations of 60 leech samples obtained by pXRF and ICP methods

| SAMPLE  | Zn (mg Kg <sup>-1</sup> ) |       | Fe (mg Kg <sup>-1</sup> ) |      | Cu (mg Kg <sup>-1</sup> ) |       | As (mg Kg <sup>-1</sup> ) |      | Ca (mg Kg <sup>-1</sup> ) |      | K (mg Kg <sup>-1</sup> ) |      | S (mg Kg <sup>-1</sup> ) |       |
|---------|---------------------------|-------|---------------------------|------|---------------------------|-------|---------------------------|------|---------------------------|------|--------------------------|------|--------------------------|-------|
|         | PXRF                      | ICP   | PXRF                      | ICP  | PXRF                      | ICP   | PXRF                      | ICP  | PXRF                      | ICP  | PXRF                     | ICP  | PXRF                     | ICP   |
| JSB-2-3 | 322.68                    | 195.5 | 3362.79                   | 2520 | 996.91                    | 820   | 5.76                      | 5.98 | 4729.97                   | 2300 | 23355.84                 | 8800 | 11950.07                 | 6900  |
| JSB-2-5 | 436.14                    | 248   | 283.50                    | 294  | 19.61                     | 26.7  | 4.87                      | 4.66 | 6747.82                   | 3000 | 22922.51                 | 8600 | 11759.28                 | 6700  |
| JSB-2-8 | 346.09                    | 212   | 2786.74                   | 2120 | 711.77                    | 541   | 7.21                      | 6.94 | 6750.05                   | 3600 | 22872.81                 | 8600 | 11570.19                 | 6650  |
| JSB-2-9 | 441.13                    | 256   | 1265.02                   | 997  | 189.84                    | 157   | 12.48                     | 10.3 | 6031.53                   | 2800 | 22769.39                 | 9000 | 11288.55                 | 6920  |
| JSB-3-1 | 344.46                    | 192.5 | 529.67                    | 447  | 75.33                     | 65.9  | 7.98                      | 7.16 | 4256.73                   | 2000 | 23329.76                 | 8700 | 11981.99                 | 6810  |
| JSB-3-2 | 360.55                    | 216   | 724.21                    | 617  | 156.70                    | 130.5 | 5.93                      | 6.24 | 4744.15                   | 2300 | 23243.52                 | 9300 | 11736.39                 | 7130  |
| JSB-3-3 | 279.86                    | 175.5 | 1341.45                   | 1740 | 168.15                    | 147   | 5.18                      | 5.63 | 3641.32                   | 1900 | 18823.94                 | 7700 | 24939.04                 | 18800 |
| JSB-3-4 | 331.25                    | 197   | 408.92                    | 458  | 26.42                     | 29.9  | 5.86                      | 5.78 | 4138.32                   | 2000 | 23480.74                 | 9100 | 12501.62                 | 6950  |
| JSB-3-5 | 370.65                    | 218   | 800.42                    | 636  | 60.33                     | 50.7  | 7.94                      | 7.11 | 5727.67                   | 2800 | 23602.81                 | 9000 | 12599.59                 | 6760  |
| JSB-3-6 | 400.71                    | 219   | 1184.30                   | 853  | 264.80                    | 184.5 | 7.61                      | 6.44 | 4702.58                   | 2200 | 22579.73                 | 8500 | 11937.83                 | 6700  |
| JSB-3-7 | 295.69                    | 187   | 2964.82                   | 2170 | 866.17                    | 693   | 5.04                      | 4.75 | 4455.75                   | 2400 | 17592.97                 | 7000 | 28158.45                 | 19600 |
| JSB-3-8 | 297.76                    | 167.5 | 568.00                    | 466  | 127.72                    | 101.5 | 5.74                      | 5.03 | 4600.00                   | 2000 | 24215.11                 | 8700 | 12771.45                 | 6570  |
| JSB-3-9 | 255.15                    | 163.5 | 1173.80                   | 974  | 304.06                    | 255   | 5.80                      | 6.06 | 4206.27                   | 2100 | 16241.42                 | 6600 | 32425.06                 | 23800 |
| JS-M-1  | 370.41                    | 211   | 569.41                    | 409  | 26.35                     | 26.9  | 7.09                      | 6.01 | 5368.60                   | 2500 | 18520.83                 | 7500 | 22824.50                 | 13000 |
| JS-X-1  | 279.49                    | 159   | 423.70                    | 352  | 36.60                     | 31.7  | 5.31                      | 4.71 | 4087.72                   | 1900 | 22984.09                 | 8700 | 11471.45                 | 6790  |

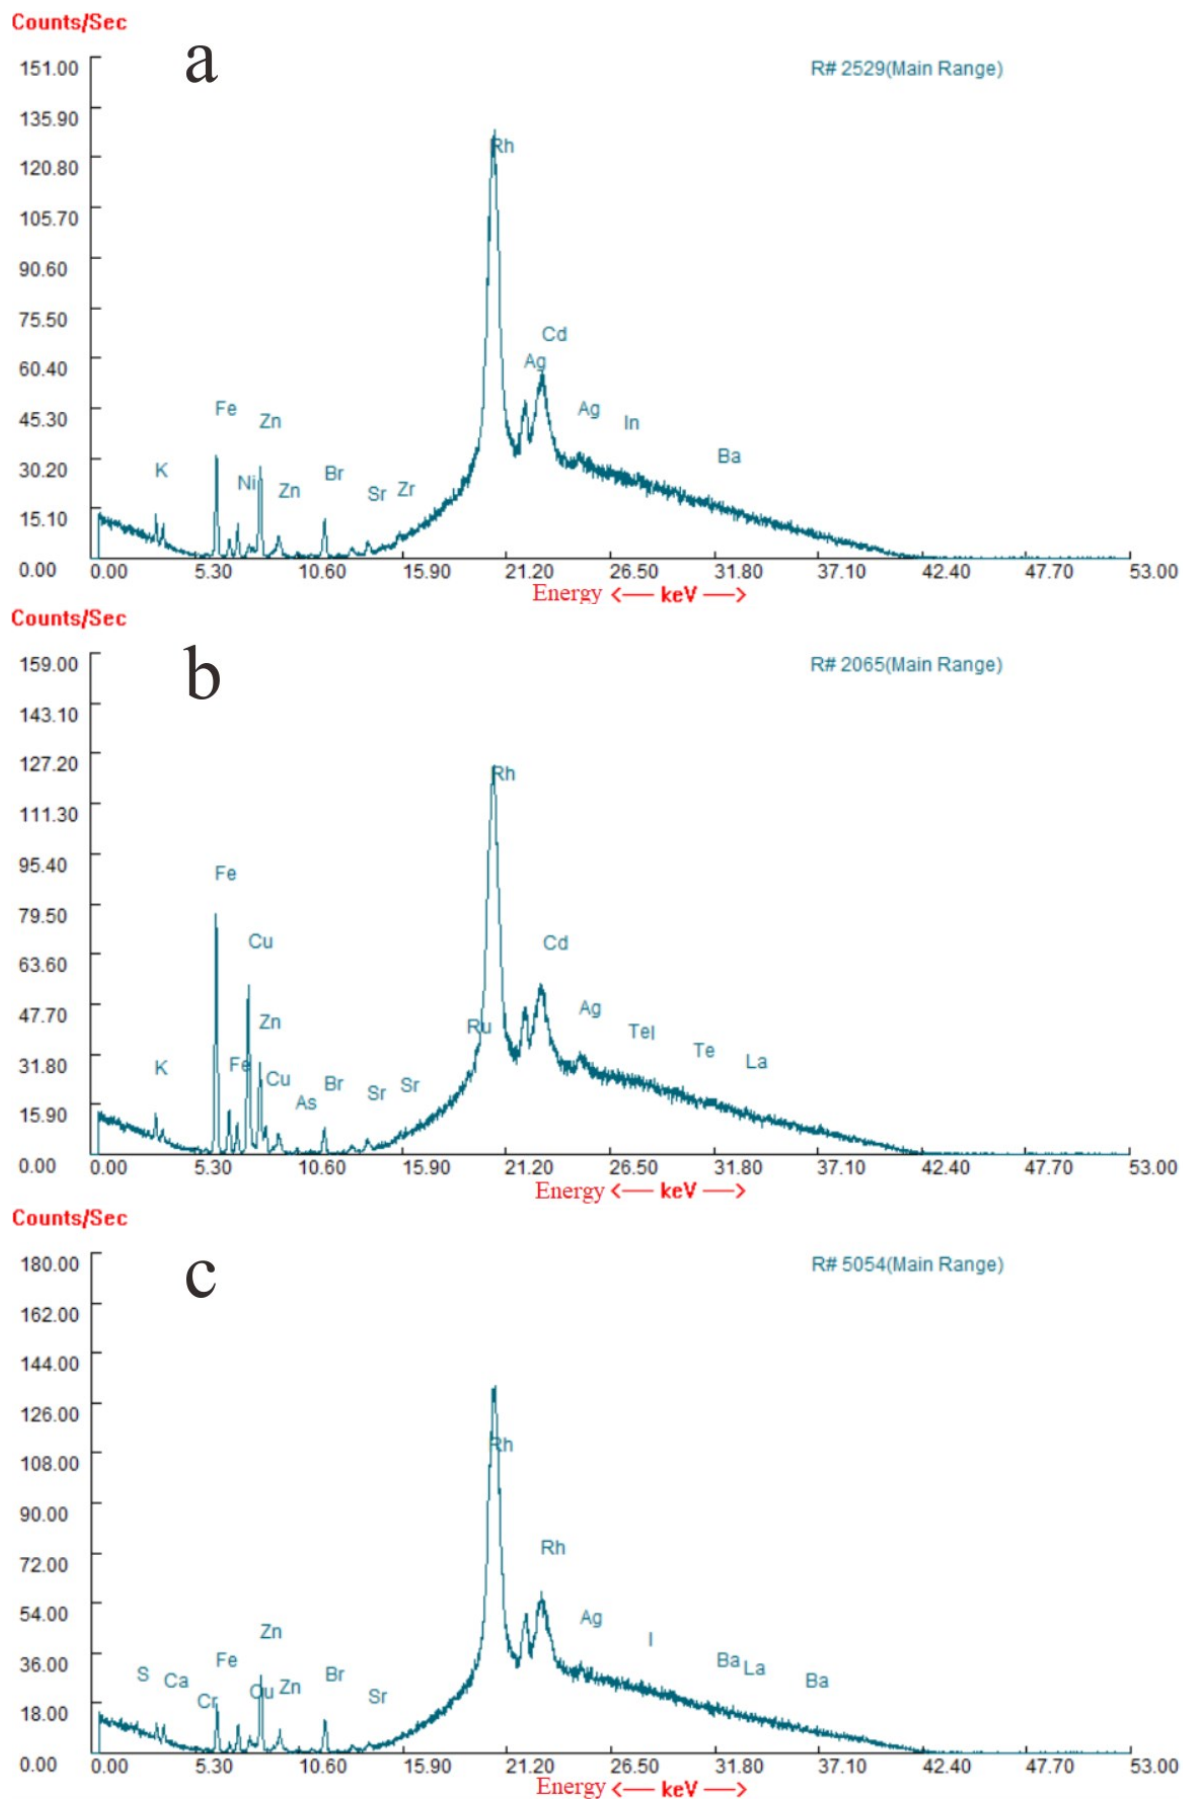

**Fig. S1** The full spectrums of three leech samples. (a) JS-6-3, (b) JSB-2-10, (c) HB-2-5. The elemental concentrations of the three leech samples are provided in Supplementary Table. S1.
